# Supplementary material for: Novel design strategies for perovskite materials with improved stability and suitable band gaps
Source: Royal Society of Chemistry journal article supplement (doi:10.1039/d1cp01397a), 2021-01-01
Supplement: d1cp01397a1.pdf [file d1cp01397a1.pdf]

## Supporting Information

### **Novel design strategies for perovskite materials with improved stability and suitable band gaps**

Bing Zhang,<sup>\*a,b</sup> Xiaogang Wang,<sup>b</sup> Yang Yang,<sup>b</sup> Bin Hu,<sup>a,b</sup> Lei Tong,<sup>b</sup> Li Zhao,<sup>a,b</sup> Qiang Lu<sup>a,b</sup>

<sup>a</sup> National Engineering Laboratory for Biomass Power Generation Equipment, North China Electric Power University, Beijing 102206, P. R. China.

<sup>b</sup> School of New Energy, North China Electric Power University, Beijing 102206, P. R. China;

\* Corresponds author: Email: 51101869@ncepu.edu.cn ; Tel: +86-10-61772079. Fax: +86-10-61772079

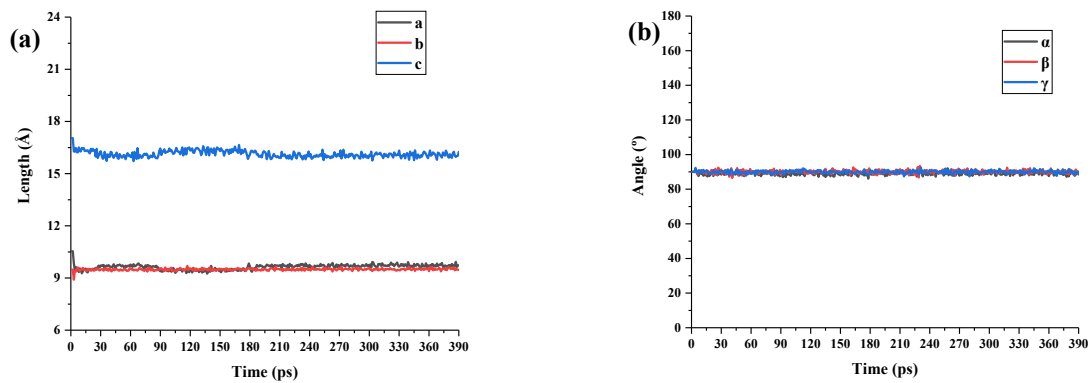

**Fig. S1** The lattice parameters of  $a$ ,  $b$ ,  $c$  (a) and  $\alpha$ ,  $\beta$ ,  $\gamma$  (b) of the  $\text{NH}_4\text{PbI}_3$  system.

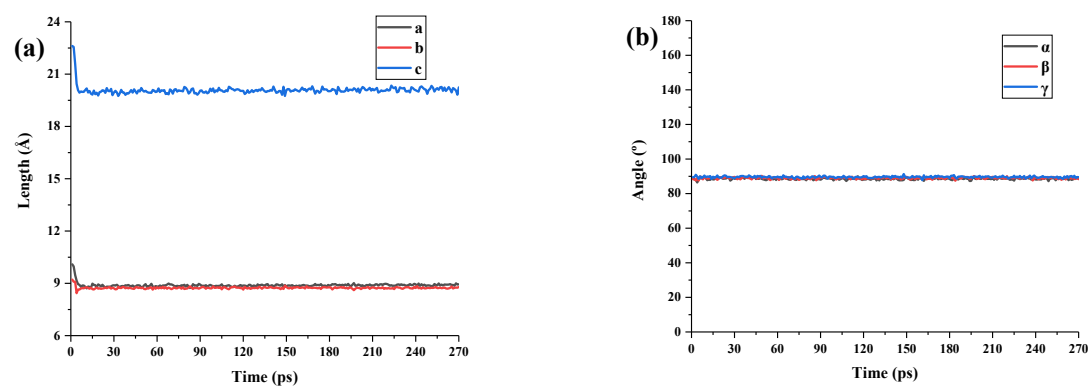

**Fig. S2** The lattice parameters of  $a$ ,  $b$ ,  $c$  (a) and  $\alpha$ ,  $\beta$ ,  $\gamma$  (b) of the  $\text{NH}_4\text{PbI}_3 \cdot 2\text{H}_2\text{O}$  system.

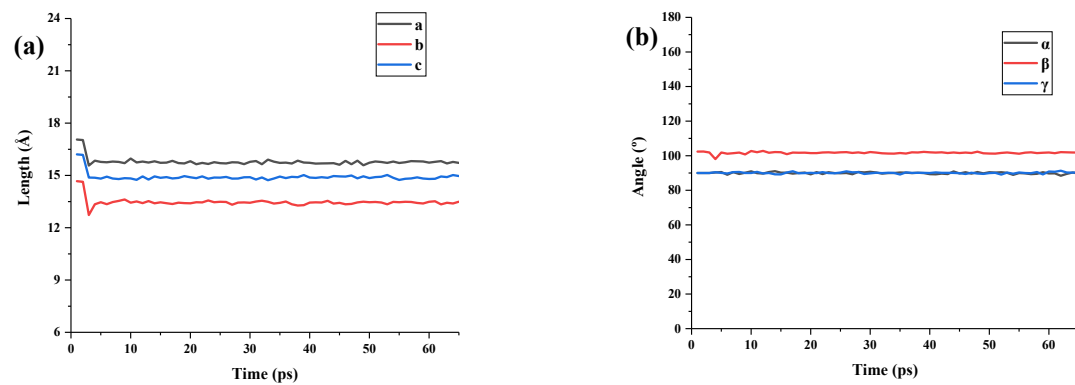

**Fig. S3** The lattice parameters of  $a$ ,  $b$ ,  $c$  (a) and  $\alpha$ ,  $\beta$ ,  $\gamma$  (b) of the  $\text{Ni}(\text{C}_{10}\text{H}_8\text{N}_2)_3\text{Pb}_2\text{I}_6$  system.

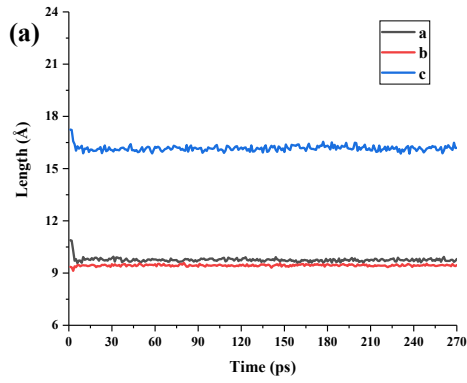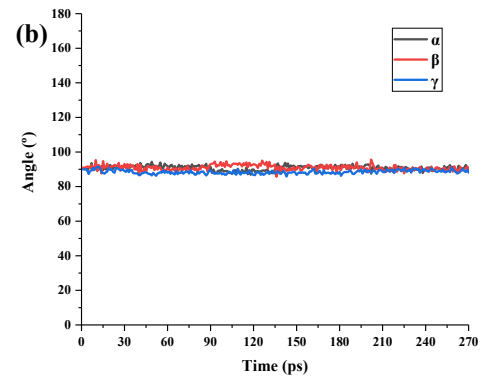

Fig. S4 The lattice parameters of a, b, c (a) and  $\alpha$ ,  $\beta$ ,  $\gamma$  (b) of the  $(\text{NH}_4)_{0.875}(\text{GUA})_{0.125}\text{PbI}_3$  system.

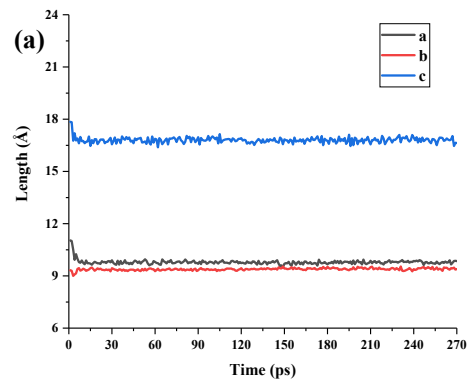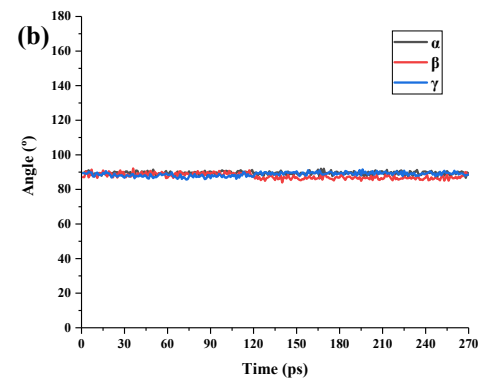

Fig. S5 The lattice parameters of a, b, c (a) and  $\alpha$ ,  $\beta$ ,  $\gamma$  (b) of the  $(\text{NH}_4)_{0.750}(\text{GUA})_{0.250}\text{PbI}_3$  system.

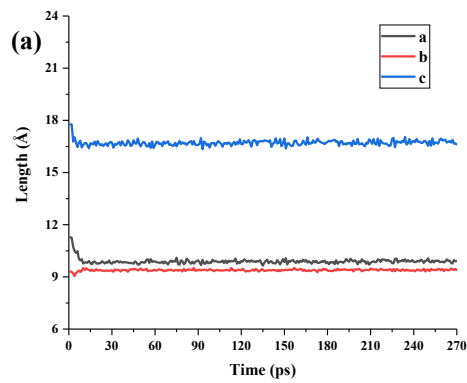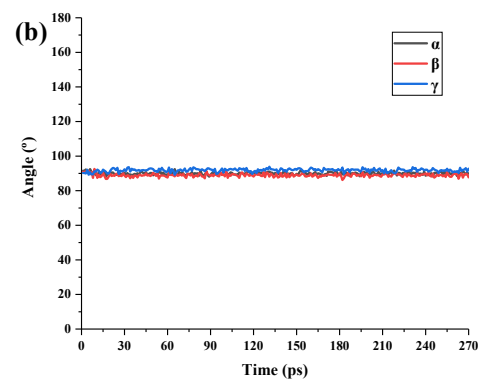

Fig. S6 The lattice parameters of a, b, c (a) and  $\alpha$ ,  $\beta$ ,  $\gamma$  (b) of the  $(\text{NH}_4)_{0.625}(\text{GUA})_{0.375}\text{PbI}_3$  system.

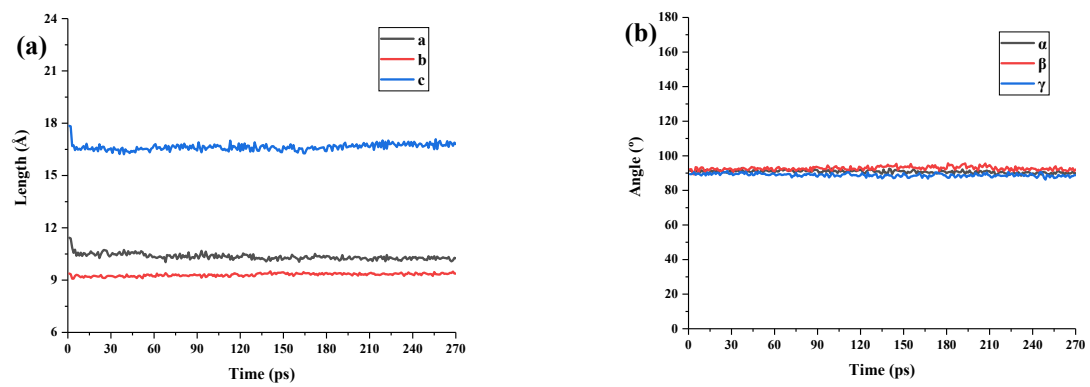

**Fig. S7** The lattice parameters of  $a$ ,  $b$ ,  $c$  (a) and  $\alpha$ ,  $\beta$ ,  $\gamma$  (b) of the  $(\text{NH}_4)_{0.500}(\text{GUA})_{0.500}\text{PbI}_3$  system.

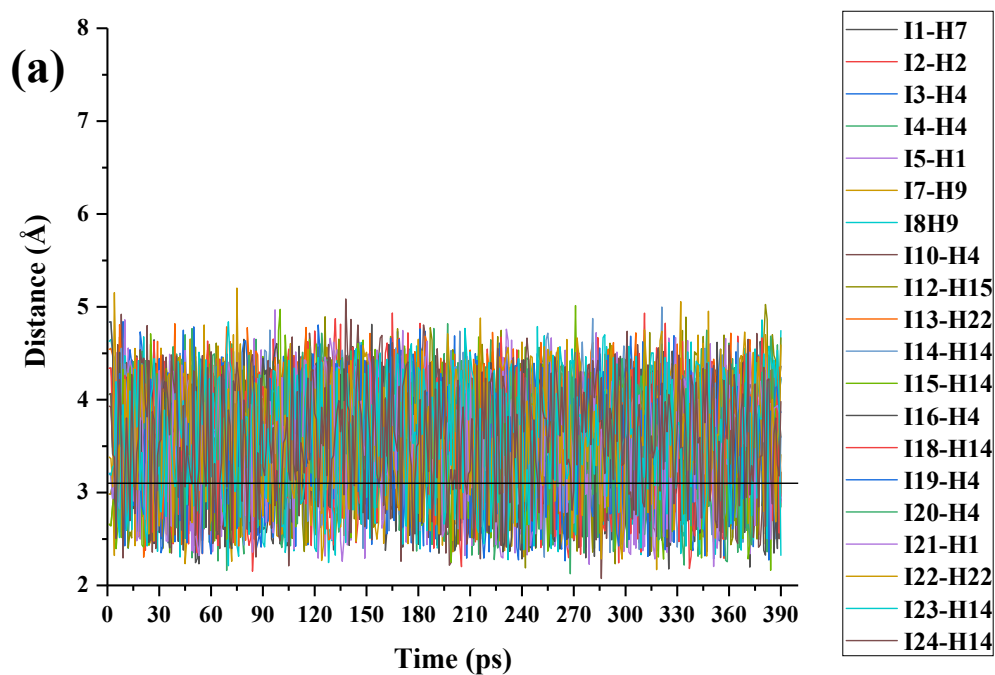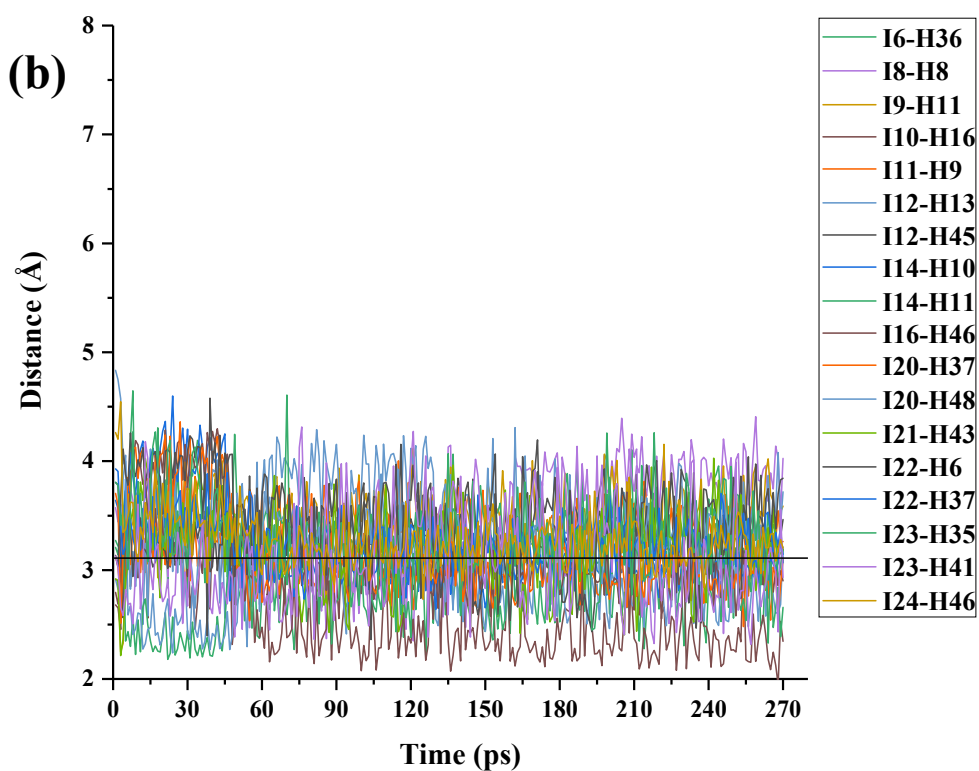

**Fig. S8** Typical (a) N-H...I HBs in  $\text{NH}_4\text{PbI}_3$ , and (b) O-H...I HBs in  $\text{NH}_4\text{PbI}_3 \cdot 2\text{H}_2\text{O}$ , respectively. The black horizontal lines represent the normal bond length H...I in N-H...I HBs of 3.10 Å and in O-H...I HBs of 3.11 Å.

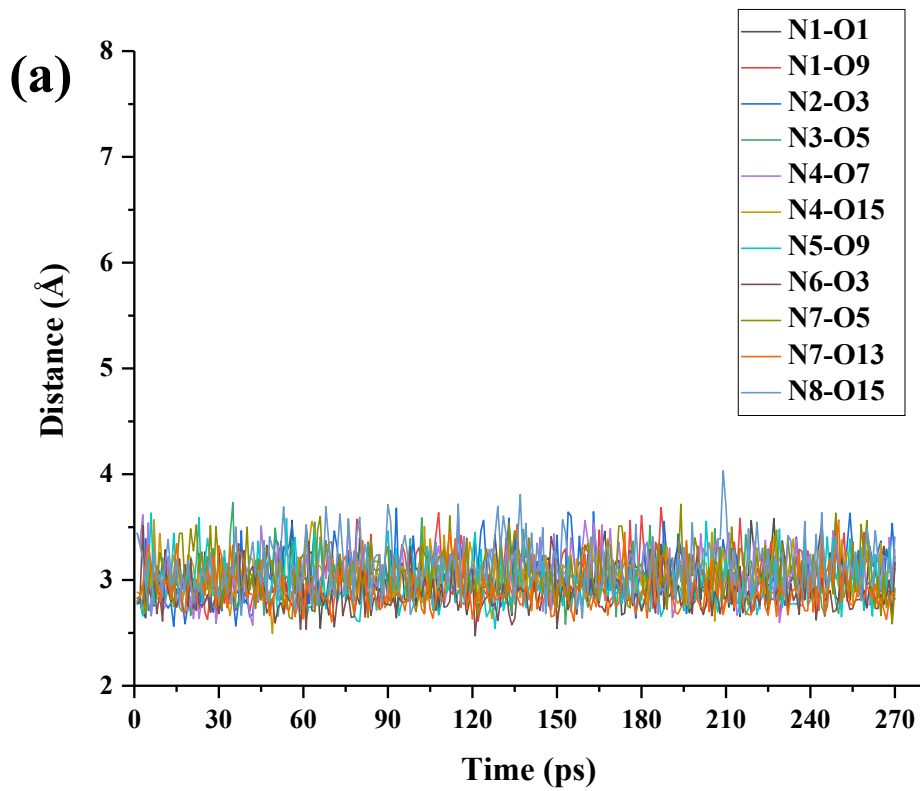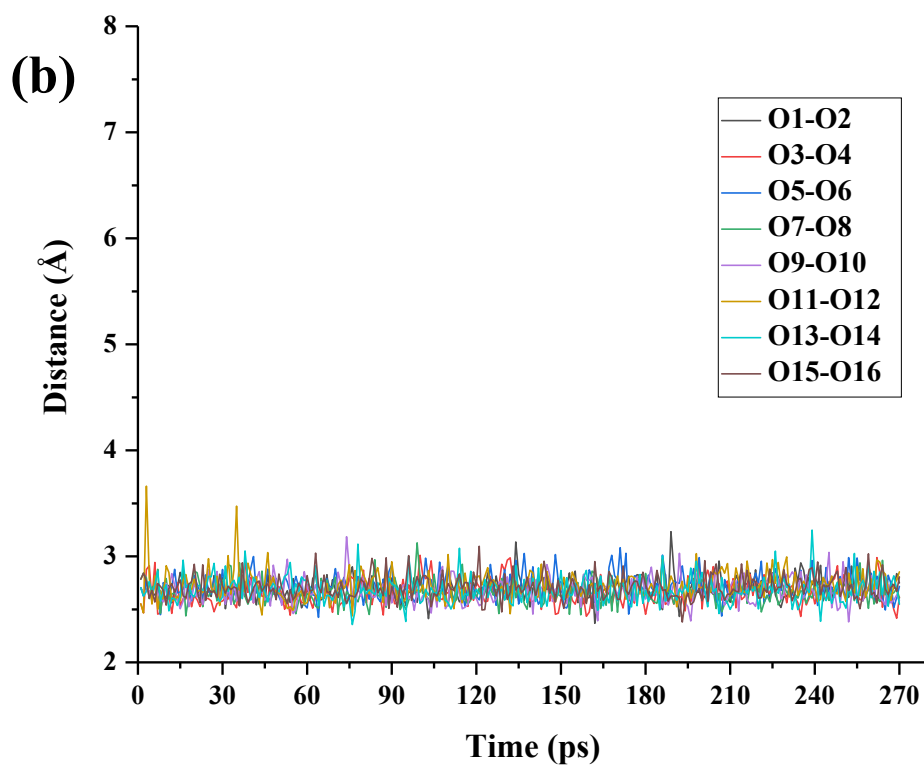

Fig. S9 The distance of (a) N-O, and (b) O-O of the HB networks in  $\text{NH}_4\text{PbI}_3 \cdot 2\text{H}_2\text{O}$  system.

In this work, all the average distances of I-H less than 4.00 Å were counted as seen in Table S1.

**Table S1** The average distances of I-H less than 4.00 Å in  $(\text{NH}_4)_{1-x}(\text{GUA})_x\text{PbI}_3$  ( $x = 0.125, 0.250, 0.375, 0.500$ ) and  $\text{NH}_4\text{PbI}_3$  system.

| x = 0.125 |              | x = 0.250 |              | x = 0.375 |              | x = 0.500 |              | $\text{NH}_4\text{PbI}_3$ |              |
|-----------|--------------|-----------|--------------|-----------|--------------|-----------|--------------|---------------------------|--------------|
| I-H       | Distance (Å) | I-H                       | Distance (Å) |
| I1-H32    | 3.62         | I1-H6     | 3.69         | I1-H36    | 2.6          | I1-H20    | 3.22         | I1-H7                     | 3.50         |
| I1-H34    | 3.69         | I1-H29    | 2.63         | I2-H21    | 2.92         | I1-H36    | 2.53         | I2-H2                     | 3.61         |
| I2-H25    | 3.53         | I1-H30    | 3.69         | I3-H2     | 3.5          | I1-H37    | 2.77         | I3-H4                     | 3.55         |
| I3-H28    | 3.56         | I3-H2     | 3.69         | I3-H24    | 2.96         | I2-H14    | 3.01         | I4-H4                     | 3.63         |
| I4-H1     | 3.72         | I3-H3     | 3.74         | I3-H26    | 2.35         | I3-H1     | 3.47         | I5-H1                     | 3.59         |
| I4-H3     | 3.47         | I4-H7     | 3.14         | I4-H18    | 3.57         | I3-H17    | 2.62         | I7-H9                     | 3.57         |
| I4-H6     | 3.42         | I4-H9     | 3.61         | I4-H32    | 2.55         | I3-H28    | 3.04         | I8-H9                     | 3.62         |
| I4-H19    | 3.49         | I4-H18    | 3.56         | I4-H34    | 2.5          | I4-H39    | 2.53         | I10-H4                    | 3.60         |
| I9-H7     | 3.63         | I4-H28    | 2.80         | I4-H35    | 2.78         | I4-H8     | 3.58         | I12-H15                   | 3.58         |
| I9-H8     | 3.50         | I5-H24    | 3.50         | I4-H7     | 3.6          | I5-H22    | 3.23         | I13-H22                   | 3.65         |
| I9-H27    | 3.75         | I5-H31    | 3.55         | I5-H30    | 2.95         | I7-H3     | 3.58         | I14-H14                   | 3.61         |
| I10-H28   | 2.90         | I6-H22    | 3.09         | I5-H32    | 3.38         | I8-H8     | 3.56         | I15-H14                   | 3.60         |
| I13-H10   | 3.46         | I6-H33    | 3.35         | I6-H21    | 3.53         | I9-H13    | 2.7          | I16-H4                    | 3.52         |
| I13-H16   | 3.70         | I6-H34    | 3.51         | I6-H29    | 3.04         | I9-H14    | 2.83         | I18-H14                   | 3.63         |
| I13-H20   | 3.42         | I6-H36    | 3.52         | I9-H21    | 2.95         | I9-H4     | 3.48         | I19-H4                    | 3.59         |
| I14-H7    | 3.71         | I7-H35    | 3.19         | I10-H30   | 3            | I13-H37   | 3.36         | I20-H4                    | 3.56         |
| I14-H8    | 3.72         | I11-H30   | 3.40         | I11-H37   | 3.48         | I14-H4    | 3.4          | I21-H1                    | 3.60         |
| I16-H11   | 3.48         | I12-H4    | 3.42         | I11-H38   | 2.92         | I10-H15   | 3.07         | I22-H22                   | 3.66         |
| I16-H13   | 3.50         | I13-H17   | 3.25         | I12-H24   | 2.67         | I13-H19   | 2.54         | I23-H14                   | 3.62         |
| I21-H9    | 3.66         | I14-H1    | 3.54         | I13-H15   | 3.56         | I13-H5    | 3.44         | I24-H14                   | 3.60         |
| I21-H18   | 3.78         | I14-H2    | 3.50         | I13-H6    | 3.45         | I14-H15   | 3.05         | -                         | -            |
| I22-H16   | 3.61         | I14-H10   | 3.42         | I14-H20   | 3.56         | I14-H25   | 2.92         | -                         | -            |
| -         | -            | I14-H19   | 3.63         | I14-H22   | 2.64         | I14-H4    | 3.4          | -                         | -            |
| -         | -            | I14-H20   | 3.69         | I14-H23   | 3.29         | I15-H16   | 2.87         | -                         | -            |
| -         | -            | I15-H19   | 3.76         | I14-H5    | 3.26         | I15-H18   | 2.43         | -                         | -            |
| -         | -            | I16-H16   | 3.50         | I15-H14   | 3.41         | I15-H6    | 3.59         | -                         | -            |
| -         | -            | I19-H14   | 3.20         | I16-H5    | 3.42         | I16-H39   | 3.26         | -                         | -            |
| -         | -            | I21-H10   | 3.56         | I17-H30   | 3.06         | I16-H40   | 2.95         | -                         | -            |
| -         | -            | I23-H15   | 3.63         | I17-H35   | 3.31         | I17-H40   | 3.17         | -                         | -            |

| x = 0.125 |              | x = 0.250 |              | x = 0.375 |              | x = 0.500 |              | NH <sub>4</sub> PbI <sub>3</sub> |              |
|-----------|--------------|-----------|--------------|-----------|--------------|-----------|--------------|----------------------------------|--------------|
| I-H       | Distance (Å) | I-H                              | Distance (Å) |
| -         | -            | -         | -            | I18-H28   | 3.51         | I18-H36   | 2.76         | -                                | -            |
| -         | -            | -         | -            | I19-H11   | 3.53         | I20-H5    | 3.54         | -                                | -            |
| -         | -            | -         | -            | I23-12    | 3.33         | I21-H25   | 2.74         | -                                | -            |
| -         | -            | -         | -            | -         | -            | I22-H30   | 2.68         | -                                | -            |
| -         | -            | -         | -            | -         | -            | I22-H38   | 3.11         | -                                | -            |
| -         | -            | -         | -            | -         | -            | I22-H40   | 3.48         | -                                | -            |
